# Supplementary material
Source: PubMed Central journal article supplement (PMC5757910)
Supplement: mmc1.pdf [file mmc1.pdf]

**Supplemental Figure 1. Selection of the study population**

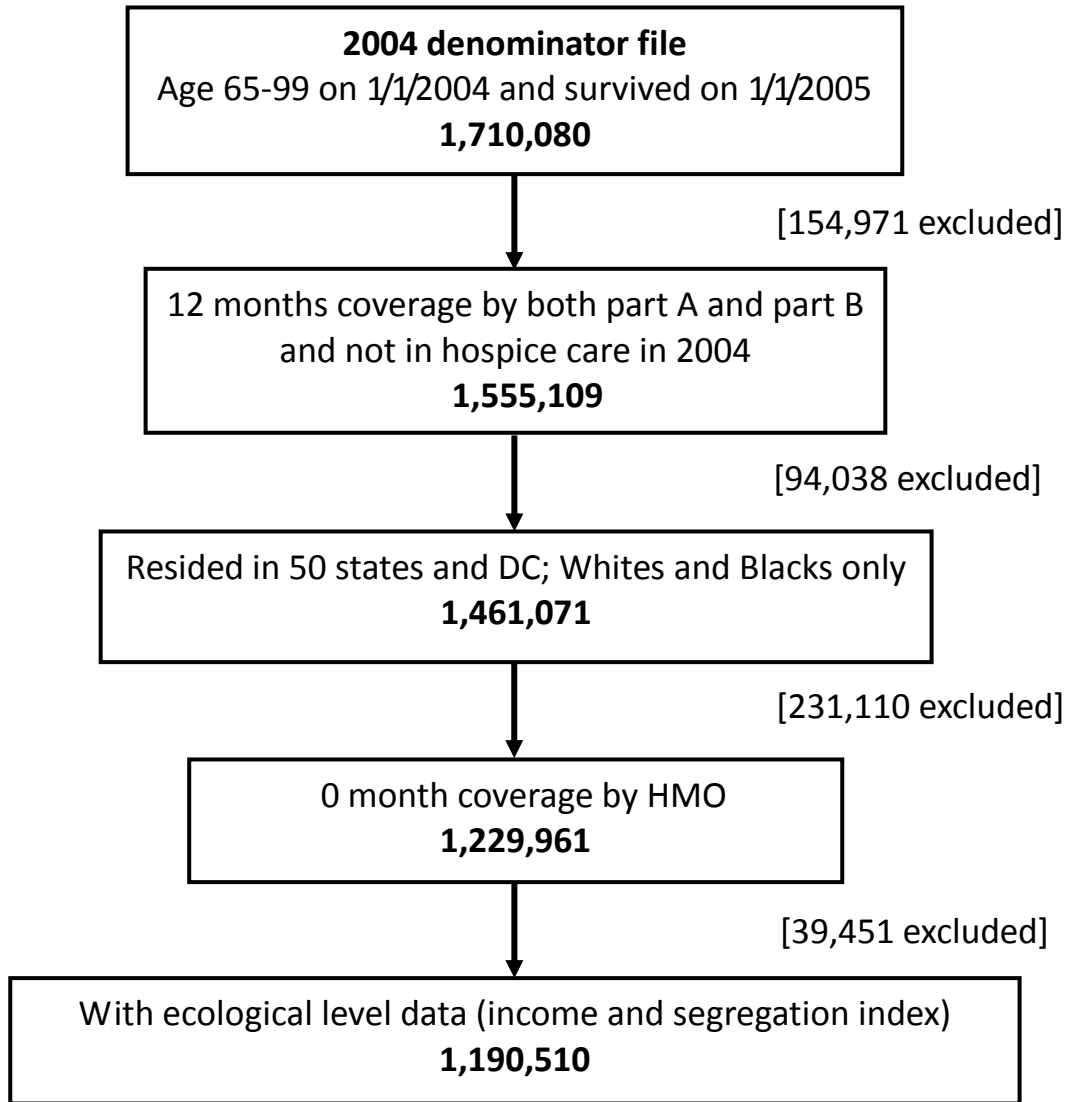

HMO: health maintenance organization

**Supplemental Figure 2. Hazard ratios (95% confidence interval) of all-cause mortality for Blacks from multivariate-adjusted Cox regression models, by age group**

**A. Results from age group 66-70 years (n=302,568)**

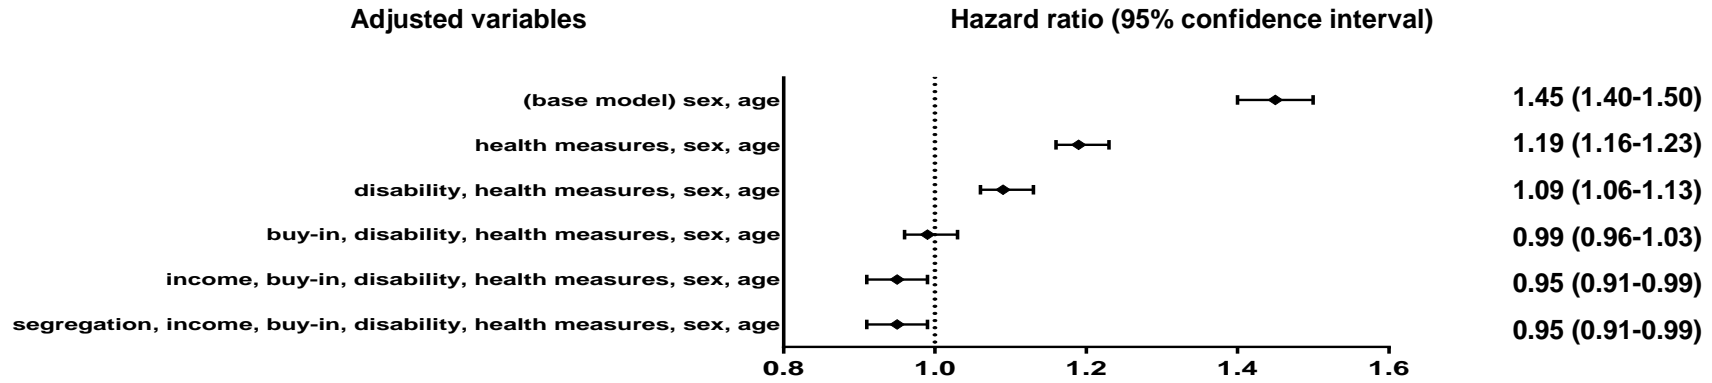

**B. Results from age group 71-75 years (n=287,556)**

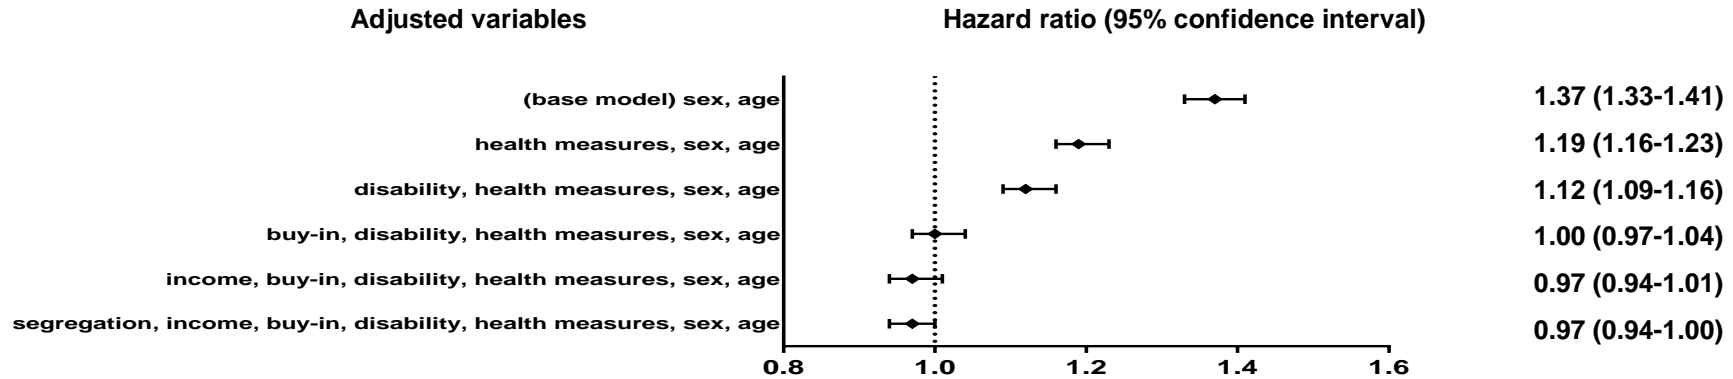

**C. Results from age group 76-80 years (n=255,075)**

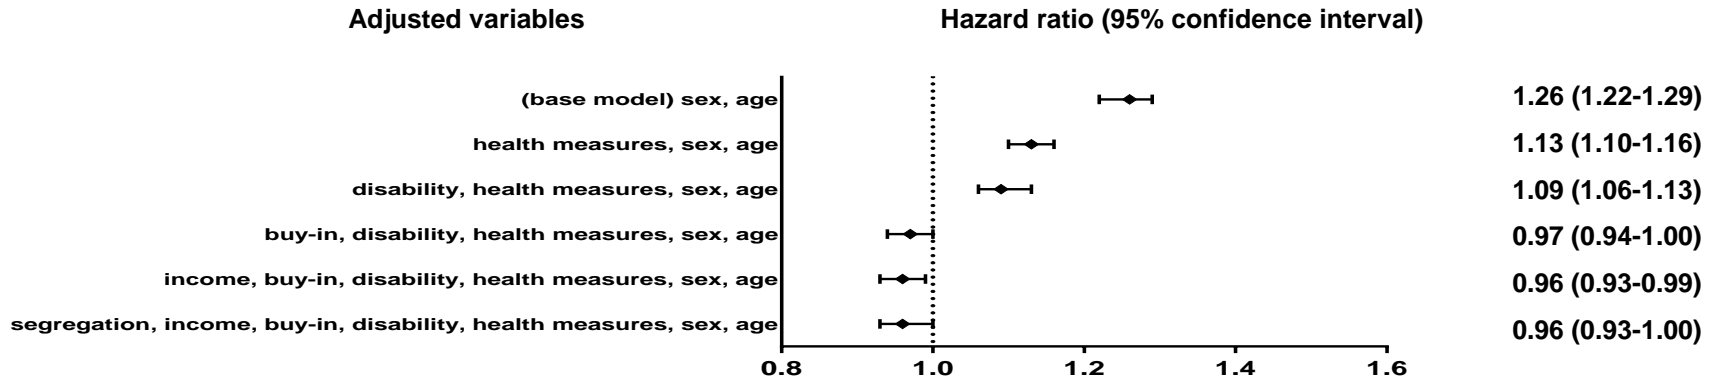

**D. Results from age group 81-85 years (n=192,018)**

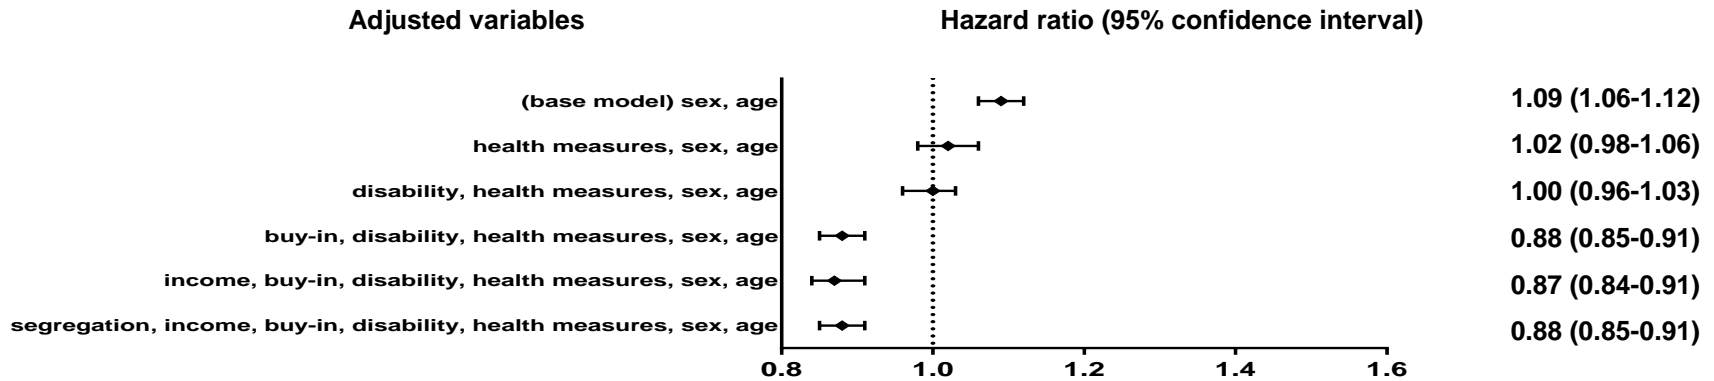

E. Results from age group 86 years old and older (n=153,293)

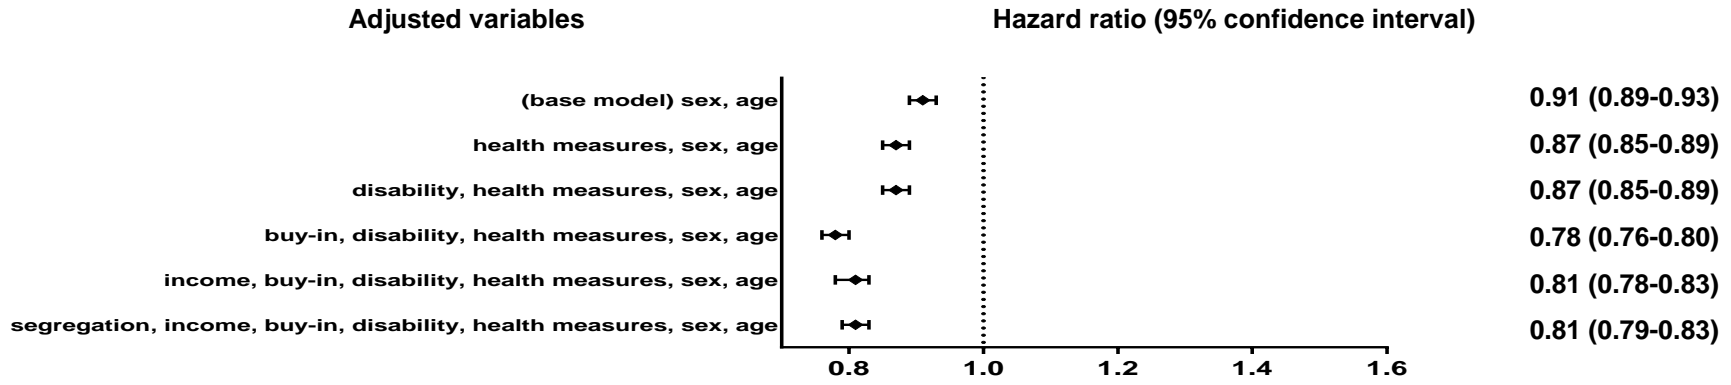

Note: Health measures include hospitalization/Charlson score and end-stage renal disease.
